1 **SARS-CoV-2 detection in nasopharyngeal throat swabs by**  
2 **metagenomics**

3

4 Le Van Tan<sup>1</sup>, Nguyen Thi Thu Hong<sup>1</sup>, Nghiem My Ngoc<sup>2</sup>, Tran Tan Thanh<sup>1</sup>, Vo Thanh  
5 Lam<sup>2</sup>, Lam Anh Nguyet<sup>1</sup>, Le Nguyen Truc Nhu<sup>1</sup>, Nguyen Thi Han Ny<sup>1</sup>, Ngo Ngoc Quang  
6 Minh<sup>3</sup>, Dinh Nguyen Huy Man<sup>2</sup>, Vu Thi Ty Hang<sup>1</sup>, Phan Nguyen Quoc Khanh<sup>1</sup>, Tran Chanh  
7 Xuan<sup>4</sup>, Nguyen Thanh Phong<sup>2</sup>, Tran Nguyen Hoang Tu<sup>2</sup>, Tran Tinh Hien<sup>1,5</sup>, Le Manh  
8 Hung<sup>2</sup>, Nguyen Thanh Truong<sup>2</sup>, Lam Minh Yen<sup>1</sup>, Nguyen Thanh Dung<sup>2</sup>, Guy Thwaites<sup>1,5</sup>,  
9 Nguyen Van Vinh Chau<sup>2</sup>, for OUCRU COVID-19 research group\*

10 \*Members of the Group are listed in the acknowledgements

11

12 <sup>1</sup>Oxford University Clinical Research Unit, Ho Chi Minh City, Vietnam

13 <sup>2</sup>Hospital for Tropical Diseases, Ho Chi Minh City, Vietnam

14 <sup>3</sup>Children's Hospital 1, Ho Chi Minh City, Vietnam

15 <sup>4</sup>Cu Chi Hospital, Ho Chi Minh City, Vietnam

16 <sup>5</sup>Centre for Tropical Medicine and Global Health, Nuffield Department of Medicine,  
17 University of Oxford, Oxford, UK

18 **Correspondence:** Le Van Tan, email: [tanlv@oucru.org](mailto:tanlv@oucru.org)

19 **Abstract:** 49

20 **Main text:** 1198

21 **Running title:** SARS-CoV-2 detection by metagenomics

22 **Key words:** COVID-19, SARS-CoV-2, coronaviruses, pandemic, Vietnam

23 **ABSTRACT**

24 Metagenomics could detect SARS-CoV-2 in all eight nasopharyngeal/throat swabs with  
25 high/low viral loads, and rhinovirus in a co-infected patient. The sequenced viruses  
26 belonged to lineage B1. Because metagenomics could detect novel pathogen and co-  
27 infection, and generate sequence data for epidemiological investigation, it is an attractive  
28 approach for infectious-disease diagnosis.

29 Metagenomics is a sensitive sequence-independence method for infectious disease diagnosis  
30 and the discovery of novel pathogens [1]. The novel coronavirus namely severe acute  
31 respiratory syndrome coronavirus 2 (SARS-CoV-2) is the cause of the ongoing coronavirus  
32 disease 2019 (COVID-19) pandemic [2]. However, there have only been three studies  
33 reporting the utility potential of metagenomics to detect SARS-CoV-2 directly from clinical  
34 specimens, with a combined sample size of nine patients [3-5]. But none of these has been  
35 conducted in resource-limited settings. In this area of the world, emerging infection however  
36 is likely to emerge. Here we describe the application of metagenomics to detect SARS-CoV-  
37 2 in RT-PCR positive nasopharyngeal throat swabs. In addition, using the obtained  
38 sequence, we genetically characterize the viruses.

## 39 **THE STUDY**

40 Since the beginning of March, 2020 an observational study have been conducted at the  
41 Hospital for Tropical Diseases (HTD) in Ho Chi Minh City, Vietnam and another one at one  
42 of its two designated centres for receiving and treating COVI-19 patients from southern  
43 Vietnam with a population of over 40 million (Figure 1). We enrolled patients with a  
44 confirmed SARS-CoV-2 diagnosis admitted to the study settings within 48 hours. We  
45 collected nasopharyngeal throat swabs (NTS), clinical and laboratory data, and travel and  
46 contact history from each study participant. The collected NTS was stored at 4<sup>0</sup>C at the  
47 study sites within four hours and was then transferred to the clinical laboratory of HTD for  
48 analysis. SARS-CoV-2 detection was carried out using a WHO recommended real time RT-  
49 PCR assays [6]. Assessment of co-infection with common respiratory viruses was carried  
50 out using multiplex RT-PCR targeted at 15 different respiratory viruses [7]. The clinical  
51 studies received approvals from the Institutional Review Board of the HTD and the Oxford

52 Tropical Research Ethics Committee of the University of Oxford. Study participants gave  
53 their written informed consent.

54 The selected samples were individually analyzed with the inclusion of a molecular grade  
55 water sample serving as a non-template control (NTC). Metagenomics was carried out as  
56 previously described [8]. DNA libraries of individual samples and NTC were then  
57 multiplexed using double unique indexes (i.e. each sample was differentiated by double  
58 barcodes) and sequenced on an Illumina MiSeq platform using a 300-cycle MiSeq reagent  
59 kit V3 (Illumina). Detection of SARS-CoV-2 and co-infection viruses in the obtained  
60 sequence data was carried out using a combination of publically available metagenomics  
61 pipelines namely IDseq (idseq.net) and DISCVR [9]. Reference based mapping approach  
62 was applied to assemble SARS-CoV-2 genomes from the obtained sequences using  
63 Geneious 11.0.3 (Biomatters, Auckland, New Zealand). SARS-CoV-2 lineage determination  
64 and detections of nonsynonymous mutations were carried out using CoV-GLUE ([http://cov-  
65 glue.cvr.gla.ac.uk](http://cov-glue.cvr.gla.ac.uk)), a publically available tool for SARS-CoV-2 sequence analysis (Figure  
66 1).

67 As of March 19<sup>th</sup>, 2020, a total of 11 PCR confirmed SARS-CoV-2 patients were enrolled in  
68 the clinical studies (Figure 1). As a pilot, we selected eight with a wide range of viral loads,  
69 as reflected by real time Cycle threshold (Ct) values, for metagenomics analysis (Figure  
70 2A). Information about demographics and clinical status of the eight included patients are  
71 presented in Table 1. All were adults and two were asymptomatic carriers identified through  
72 contact tracing approach implemented in Vietnam [10]. Three were cases of locally acquired  
73 infection and five were imported cases, and one was co-infected with rhinovirus.

74 Information about duration of stay and clinical and laboratory findings are presented in  
75 Table 1.  
76 Metagenomics generated a total of 2–4 million reads per sample in 7/8 included NTS. In the  
77 remaining sample, ¼ million reads were obtained (Table 2). SARS-CoV-2 were detected in  
78 sequence data obtained from all eight RT-PCR positive NTS samples by both IDseq and  
79 DISCVR, but not in the NTS sample. One patient presenting with respiratory infection was  
80 co-infected with rhinovirus, which was also detected by metagenomics.  
81 Results of reference-based mapping showed three consensus had genome coverage of  
82  $\geq 70\%$ , while the remaining five had coverage of  $< 50\%$  (Table 2 and Supplementary Figure  
83 1). Analysis of the obtained consensus showed all belong to lineage B1. A total of 11  
84 nonsynonymous substitutions were detected in three of the eight obtained consensus  
85 (Supplementary Table 1).

## 86 **CONCLUSIONS**

87 The emergence of SARS-CoV-2 emphasizes the continuous unprecedented threat posed by  
88 emerging infectious diseases, especially those caused by novel viruses. The diagnosis of  
89 respiratory diseases is highly challenging because the responsible pathogens are diverse. In  
90 addition, the emergence of novel pathogens further challenges routine diagnosis. Indeed,  
91 SARS-CoV-2 initially went undetected by PCR panels targeted at common respiratory  
92 viruses [2]. New diagnostic approach is therefore urgently needed to address the ongoing  
93 challenge posed by emerging infections.

94 Here, we demonstrated that when coupled with publically available bioinformatics tools,  
95 metagenomics could detect SARS-CoV-2 in RT-PCR positive NTS samples with a wide  
96 range of viral loads. The data suggests that metagenomics is a sensitive assay for SARS-

97 CoV-2 diagnosis and detection of co-infection as illustrated by the detection of rhinovirus,  
98 in line with a recent report [4], important for clinical management. In addition to providing  
99 diagnostic information, the obtained sequences also allows for genetic characterization, and  
100 detection of genetic variations in the genomes of the pathogen under investigation. Indeed,  
101 using the obtained sequences, we successfully identified that all the Vietnamese viruses  
102 included for analysis belonged to lineage B1, which has been found worldwide [11]. In line  
103 with a recent report [12], we identify several nonsynonymous substitutions in the obtained  
104 genomes SARS-CoV-2. Further research is needed to ascribe the potential consequences  
105 that SARS-CoV-2 evolution may have.

106 Currently, real time RT-PCR is used for screening of suspected cases of SARS-CoV-2  
107 infection [6]. Compared with RT-PCR, metagenomics based on Illumina sequencing  
108 technologies remains high cost and low throughput. However, these caveats could be  
109 overcome by third generation sequencing technologies such as Oxford Nanopore [13],  
110 which warrants further research.

111 The application of metagenomics for SARS-CoV-2 and respiratory diagnosis would be  
112 highly relevant in the near future. This is because SARS-CoV-2 has spread globally, and  
113 will likely soon become endemic worldwide. Indeed as of May 21<sup>st</sup>, 2020 nearly 5 million  
114 cases have been reported globally. Notably, the vast majority of SARS-CoV-2 infections are  
115 asymptomatic or mild, while COVID-19 patients present with signs/symptoms  
116 undistinguished with respiratory diseases caused by other viruses [14, 15]. As such rapid  
117 identification of the likely cause of hospitalized patients with respiratory infections is  
118 essential for clinical management and outbreak response. Under this circumstance,  
119 metagenomics is a preferable method because of its ability to detect both known and

120 unknown pathogens presenting in the tested specimens without the need of pathogen  
121 specific PCR primers [1, 13].  
122 Our study has some limitations. Only a small number of patients were included for analysis,  
123 owing to the nature of a pilot in itself. However during the study period, there were only 14  
124 SARS-CoV-2 confirmed cases reported in our setting, Ho Chi Minh City, Vietnam. As a  
125 consequence, we were not able to properly assess the sensitivity and specificity of  
126 metagenomics for the diagnosis of COVID-19.  
127 In summary, we show that metagenomics is a sensitive assay for sequence-independent  
128 detection of SARS-CoV-2 NTS samples. The ability of metagenomics to detect co-infection  
129 and novel pathogens, and generate sequence data for molecular epidemiological  
130 investigation makes it an attractive approach for infectious disease diagnosis.

131 **ACKNOWLEDGEMENTS**

132 This study was funded by the Wellcome Trust of Great Britain (106680/B/14/Z and  
133 204904/Z/16/Z).

134 We are indebt to Ms Nguyen Thanh Ngoc, Ms Le Kim Thanh, and the OUCRU  
135 IT/CTU/Laboratory Management departments for their support.

136

137 We thank the patients for their participations in this study, and the doctors and nurses at  
138 HTD Cu Chi Hospital, who cared for the patients and provided the logistic support with the  
139 study.

140 **OUCRU COVID-19 Research Group**

141 **Hospital for Tropical Diseases, Ho Chi Minh City, Vietnam:** Nguyen Van Vinh Chau,  
142 Nguyen Thanh Dung, Le Manh Hung, Huynh Thi Loan, Nguyen Thanh Truong, Nguyen  
143 Thanh Phong, Dinh Nguyen Huy Man, Nguyen Van Hao, Duong Bich Thuy, Nghiem My  
144 Ngoc, Nguyen Phu Huong Lan, Pham Thi Ngoc Thoa, Tran Nguyen Phuong Thao, Tran Thi  
145 Lan Phuong, Le Thi Tam Uyen, Tran Thi Thanh Tam, Bui Thi Ton That, Huynh Kim  
146 Nhung, Ngo Tan Tai, Tran Nguyen Hoang Tu, Vo Trong Vuong, Dinh Thi Bich Ty, Le Thi  
147 Dung, Thai Lam Uyen, Nguyen Thi My Tien, Ho Thi Thu Thao, Nguyen Ngoc Thao,  
148 Huynh Ngoc Thien Vuong, Pham Ngoc Phuong Thao, Phan Minh Phuong

149 **Oxford University Clinical Research Unit, Ho Chi Minh City, Vietnam:** Dong Thi Hoai  
150 Tam, Evelyne Kestelyn, Donovan Joseph, Ronald Geskus, Guy Thwaites, H. Rogier van  
151 Doorn, Huynh Le Anh Huy, Huynh Ngan Ha, Huynh Xuan Yen, Jennifer Van Nuil, Jeremy  
152 Day, Joseph Donovan, Katrina Lawson, Lam Anh Nguyet, Lam Minh Yen, Le Nguyen Truc  
153 Nhu, Le Thanh Hoang Nhat, Le Van Tan, Sonia Lewycka Odette, Louise Thwaites, Maia  
154 Rabaa, Marc Choisy, Mary Chambers, Motiur Rahman, Ngo Thi Hoa, Nguyen Thanh Thuy  
155 Nhien, Nguyen Thi Han Ny, Nguyen Thi Kim Tuyen, Nguyen Thi Phuong Dung, Nguyen  
156 Thi Thu Hong, Nguyen Xuan Truong, Phan Nguyen Quoc Khanh, Phung Le Kim Yen,  
157 Sophie Yacoub, Thomas Kesteman, Nguyen Thuy Thuong Thuong, Tran Tan Thanh, Tran  
158 Tinh Hien, Vu Thi Ty Hang

159 **ABOUT THE AUTHOR**

160 Dr Le Van Tan is head of Emeging Infections at Oxford Univeristy Clinical Resarh Unit.

161 His research interest includes novel diagnosis and emerging infections.

162

163 **REFERENCES**

- 164 1. Chiu, C.Y. and S.A. Miller, *Clinical metagenomics*. Nat Rev Genet, 2019. **20**(6): p.  
165 341-355.
- 166 2. Zhu, N., D. Zhang, W. Wang, X. Li, B. Yang, J. Song, X. Zhao, B. Huang, W. Shi,  
167 R. Lu, P. Niu, F. Zhan, X. Ma, D. Wang, W. Xu, G. Wu, G.F. Gao, W. Tan, I. China



- 168 Novel Coronavirus, and T. Research, *A Novel Coronavirus from Patients with*  
169 *Pneumonia in China, 2019*. N Engl J Med, 2020. **382**(8): p. 727-733.
- 170 3. Chen, L., W. Liu, Q. Zhang, K. Xu, G. Ye, W. Wu, Z. Sun, F. Liu, K. Wu, B. Zhong,  
171 Y. Mei, W. Zhang, Y. Chen, Y. Li, M. Shi, K. Lan, and Y. Liu, *RNA based mNGS*  
172 *approach identifies a novel human coronavirus from two individual pneumonia*  
173 *cases in 2019 Wuhan outbreak*. Emerg Microbes Infect, 2020. **9**(1): p. 313-319.
- 174 4. Peddu, V., R.C. Shean, H. Xie, L. Shrestha, G.A. Perchetti, S.S. Minot, P.  
175 Roychoudhury, M.L. Huang, A. Nalla, S.B. Reddy, Q. Phung, A. Reinhardt, K.R.  
176 Jerome, and A.L. Greninger, *Metagenomic analysis reveals clinical SARS-CoV-2*  
177 *infection and bacterial or viral superinfection and colonization*. Clin Chem, 2020.
- 178 5. Ai, J.W., Y. Zhang, H.C. Zhang, T. Xu, and W.H. Zhang, *Era of molecular*  
179 *diagnosis for pathogen identification of unexplained pneumonia, lessons to be*  
180 *learned*. Emerg Microbes Infect, 2020. **9**(1): p. 597-600.
- 181 6. Corman, V.M., O. Landt, M. Kaiser, R. Molenkamp, A. Meijer, D.K. Chu, T.  
182 Bleicker, S. Brunink, J. Schneider, M.L. Schmidt, D.G. Mulders, B.L. Haagmans, B.  
183 van der Veer, S. van den Brink, L. Wijsman, G. Goderski, J.L. Romette, J. Ellis, M.  
184 Zambon, M. Peiris, H. Goossens, C. Reusken, M.P. Koopmans, and C. Drosten,  
185 *Detection of 2019 novel coronavirus (2019-nCoV) by real-time RT-PCR*. Euro  
186 *Surveill*, 2020. **25**(3).
- 187 7. Jansen, R.R., J. Schinkel, S. Koekkoek, D. Pajkrt, M. Beld, M.D. de Jong, and R.  
188 Molenkamp, *Development and evaluation of a four-tube real time multiplex PCR*  
189 *assay covering fourteen respiratory viruses, and comparison to its corresponding*  
190 *single target counterparts*. J Clin Virol, 2011. **51**(3): p. 179-85.
- 191 8. Anh, N.T., N.T.T. Hong, L.N.T. Nhu, T.T. Thanh, C.Y. Lau, D. Limmathurotsakul,  
192 X. Deng, M. Rahman, N.V.V. Chau, H.R. van Doorn, G. Thwaites, E. Delwart, and  
193 L.V. Tan, *Viruses in Vietnamese Patients Presenting with Community-Acquired*  
194 *Sepsis of Unknown Cause*. J Clin Microbiol, 2019. **57**(9).
- 195 9. Maabar, M., A.J. Davison, M. Vucak, F. Thorburn, P.R. Murcia, R. Gunson, M.  
196 Palmarini, and J. Hughes, *DisCVR: Rapid viral diagnosis from high-throughput*  
197 *sequencing data*. Virus Evol, 2019. **5**(2): p. vez033.
- 198 10. Dinh, L., P. Dinh, P.D.M. Nguyen, D.H.N. Nguyen, and T. Hoang, *Vietnam's*  
199 *response to COVID-19: Prompt and proactive actions*. J Travel Med, 2020.
- 200 11. Rambaut, A., E.C. Holmes, V. Hill, Á. O'Toole, J.T. McCrone, C. Ruis, L. du  
201 Plessis, and O.G. Pybus, 2020.
- 202 12. van Dorp, L., M. Acмна, D. Richarch, P.L. Shaw, E.C. Fprd, L. Ormond, J.C. Owen,  
203 J. Pang, C.S.C. Tan, A.T.F. Boshier, T.A. Ortiz, and F. Balloux, *Emergence of*  
204 *genomic diversity and recurrent mutations in SARS-CoV-2*. Infection, Genetics and  
205 *Evolution*, 2020. **in press**.
- 206 13. Yang, L., G. Haidar, H. Zia, R. Nettles, S. Qin, X. Wang, F. Shah, S.F. Rapport, T.  
207 Charalampous, B. Methe, A. Fitch, A. Morris, B.J. McVerry, J. O'Grady, and G.D.  
208 Kitsios, *Metagenomic identification of severe pneumonia pathogens in mechanically-*  
209 *ventilated patients: a feasibility and clinical validity study*. Respir Res, 2019. **20**(1):  
210 p. 265.
- 211 14. Goyal, P., J.J. Choi, L.C. Pinheiro, E.J. Schenck, R. Chen, A. Jabri, M.J. Satlin, T.R.  
212 Champion, Jr., M. Nahid, J.B. Ringel, K.L. Hoffman, M.N. Alshak, H.A. Li, G.T.  
213 Wehmeyer, M. Rajan, E. Reshetnyak, N. Hupert, E.M. Horn, F.J. Martinez, R.M.

- 214 Gulick, and M.M. Safford, *Clinical Characteristics of Covid-19 in New York City*. N  
215 Engl J Med, 2020.
- 216 15. Grasselli, G., A. Zangrillo, A. Zanella, M. Antonelli, L. Cabrini, A. Castelli, D.  
217 Cereda, A. Coluccello, G. Foti, R. Fumagalli, G. Iotti, N. Latronico, L. Lorini, S.  
218 Merler, G. Natalini, A. Piatti, M.V. Ranieri, A.M. Scandroglio, E. Storti, M.  
219 Cecconi, A. Pesenti, and C.-L.I. Network, *Baseline Characteristics and Outcomes of*  
220 *1591 Patients Infected With SARS-CoV-2 Admitted to ICUs of the Lombardy Region,*  
221 *Italy*. JAMA, 2020.

**Table 1:** Demographics, clinical and real time RT-PCR data of the study participants

|                                                   | Patient 1 | Patient 2 | Patient 3 | Patient 4 | Patient 5 | Patient 6 | Patient 7 | Patient 8 |
|---------------------------------------------------|-----------|-----------|-----------|-----------|-----------|-----------|-----------|-----------|
| <b>Age range</b>                                  | 30's      | 40's      | 20's      | 30's      | 20's      | 20's      | 40's      | 10's      |
| <b>Gender</b>                                     | Male      | Male      | Male      | Male      | Female    | Female    | Female    | Male      |
| <b>Arriving in Vietnam from abroad (Yes/No)</b>   | Yes       | Yes       | No        | No        | No        | Yes       | Yes       | Yes       |
| <b>Locally acquired infection (Yes/No)</b>        | No        | No        | Yes       | Yes       | Yes       | No        | No        | No        |
| <b>Days from confirmed diagnosis to enrolment</b> | 2         | 1         | 3         | 2         | 3         | 2         | 1         | 0         |
| <b>Days from admission to enrolment</b>           | 2         | 1         | 2         | 1         | 0         | 1         | 2         | 0         |
| <b>Duration of stay</b>                           | 15        | NA        | 17        | 18        | 15        | 12        | 13        | 17        |
| <b>Symptomatic (S)/asymptomatic (A)</b>           | S         | S         | S         | A         | S         | A         | S         | S         |
| <b>Laboratory results</b>                         |           |           |           |           |           |           |           |           |
| White-cell count (×103per µl)                     | 4.23      | 6.89      | 3.96      | NA        | 6.85      | 4.83      | 3.46      | 8.27      |
| Lymphocyte counts (×103per µl)                    | 0.8       | 0.54      | 1.08      | NA        | 2.94      | 2.50      | 0.88      | 2.40      |
| Hemoglobin ((g/dl)                                | 13.6      | 14.6      | 16.8      | NA        | 15.7      | 15.00     | 11.60     | 15.60     |
| Hematocrit (%)                                    | 42.4      | 43.4      | 41.6      | NA        | 37.4      | 35.78     | 28.48     | 38.09     |
| Platelet count (per µl)                           | 140       | 235       | 187       | NA        | 414       | 321.00    | 178.00    | 330.00    |
| Glucose (mg/dl)                                   | 125.7     | 112       | 85        | NA        | NA        | NA        | 76.80     | 98.50     |
| Creatinine (mg/dl)                                | 0.96      | 1.28      | 1.2       | NA        | NA        | NA        | 0.99      | 1.19      |
| Aspartate aminotransferase (U/liter)              | 24        | 17        | 22        | NA        | NA        | NA        | 17.40     | 23.30     |
| Alanine aminotransferase (U/liter)                | 23        | 16        | 24        | NA        | NA        | NA        | 17.40     | 25.30     |
| <b>Clinical signs/symptoms (Yes/No)</b>           |           |           |           |           |           |           |           |           |
| Fever                                             | Y         | Y         | Y         | N         | N         | N         | N         | N         |
| Cough                                             | N         | Y         | N         | N         | N         | N         | Y         | N         |
| Rhinorrhea                                        | N         | N         | Y         | N         | Y         | N         | N         | Y         |
| Fatigue                                           | N         | Y         | N         | N         | N         | N         | N         | N         |
| Diarrhea                                          | N         | N         | N         | N         | N         | N         | N         | Y         |
| Sore throat                                       | N         | N         | Y         | N         | N         | N         | Y         | N         |
| Muscle pain                                       | N         | Y         | N         | N         | N         | N         | Y         | N         |
| Headache                                          | N         | Y         | N         | N         | N         | N         | N         | N         |
| Abdominal pain                                    | N         | N         | N         | N         | N         | N         | N         | N         |
| Lost sense of smell                               | N         | N         | N         | N         | Y         | N         | N         | N         |

**Table 2:** Results of mNGS and lineage assignment SARS-CoV-2 sequences

| <b>Patient number</b> | <b>Ct values</b> | <b>Total single reads</b> | <b>No of SARS-CoV-2 reads</b> | <b>% SARS-CoV-2 genome coverage</b> | <b>SARS-CoV-2 lineage</b> |
|-----------------------|------------------|---------------------------|-------------------------------|-------------------------------------|---------------------------|
| 1                     | 26.52            | 3,182,758                 | 84                            | 16                                  | B1                        |
| 2                     | 21.47            | 4,218,464                 | 6930                          | 70                                  | B1                        |
| 3                     | 27.06            | 2,735,464                 | 573                           | 36                                  | B1                        |
| 4                     | 32.09            | 1,902,512                 | 68                            | 12                                  | B1                        |
| 5                     | 24.81            | 245,818                   | 14                            | 3                                   | B1                        |
| 6                     | 25.68            | 3,524,972                 | 995                           | 48                                  | B1                        |
| 7                     | 24.56            | 2,440,326                 | 16564                         | 87                                  | B1                        |
| 8                     | 24.13            | 3,253,308                 | 9095                          | 80                                  | B1                        |

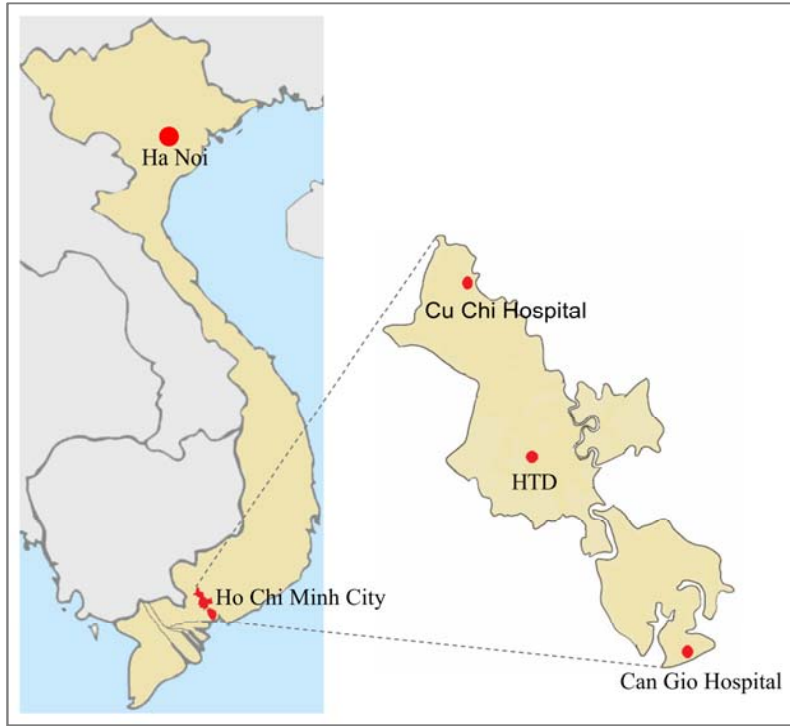

**Figure 1:** Flowchart showing the study settings and the clinical studies. **(A)** Map showing the location of the Hospital for Tropical Diseases (HTD) main campus and its designated COVID-19 centres in Cu Chi where the clinical study was conducted, and Can Gio, **(B)** Flowchart illustrating the patient enrolment, mNGS analysis and post run analysis of the obtained sequences

**Note to Figure 1:**

Maps were obtained from <https://mapchart.net/>.

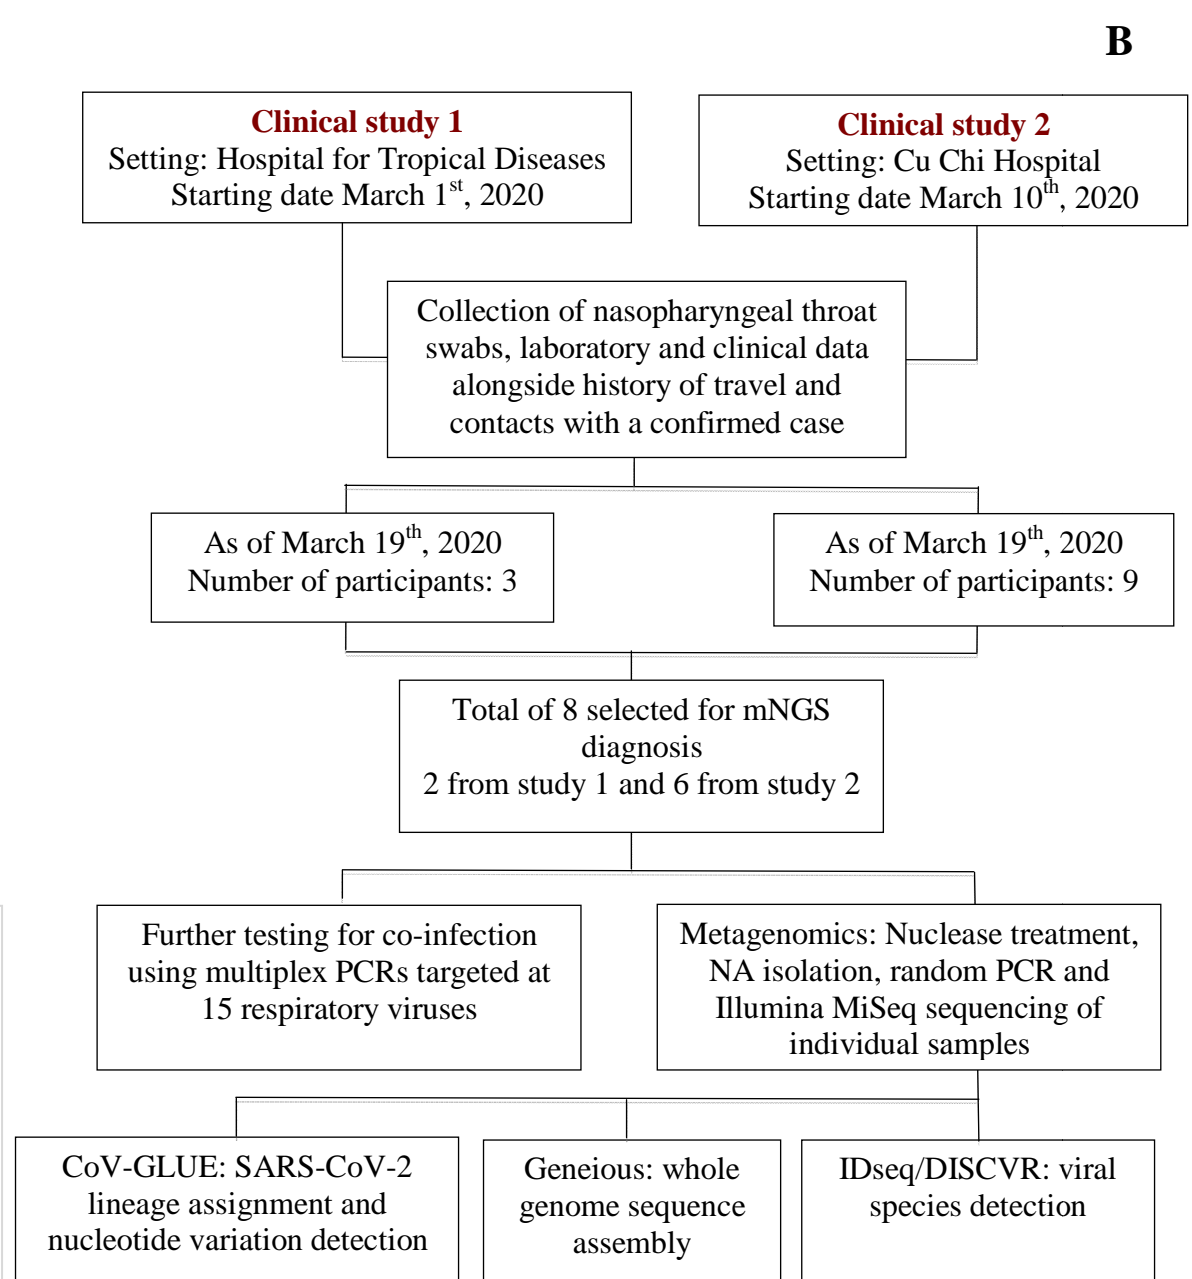

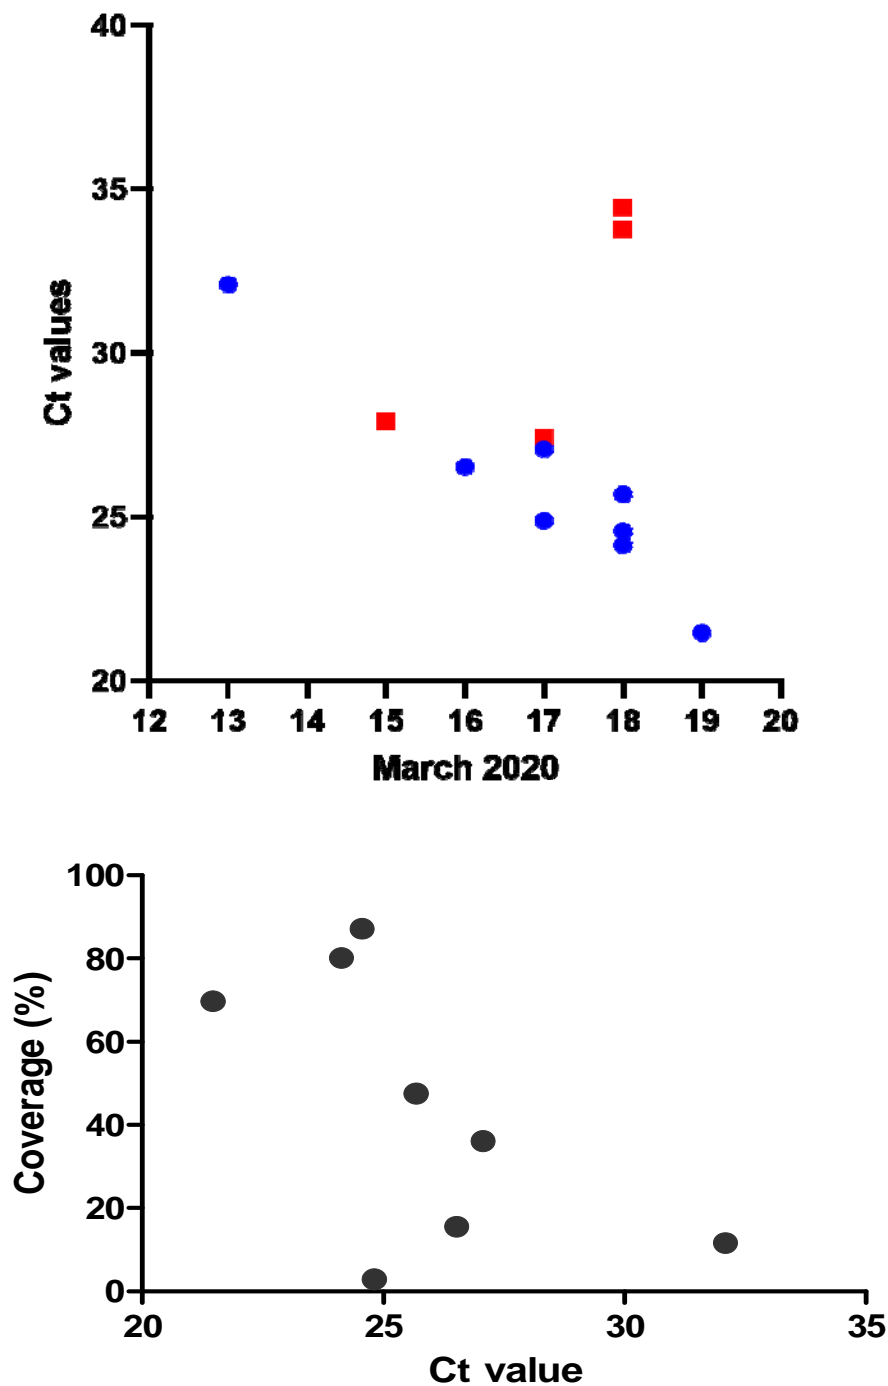

**Figure 2:** Distribution of Ct values of nasopharyngeal throat swabs of the study participant (A), and the association between Ct values and genome coverage of SARS-CoV-2 generated by mNGS (B)

**Note to Figure 2A:** Blue dot represent for samples selected for mNGS while red squares represent for samples not selected for mNGS. Numbers on the X axis represent for calendar days of March 2020

**Supplementary Table 1:** list of non synonymous substitution detected in eight consensuses of the present study

|           | <b>Nucleotide variation*</b> | <b>Coding Region</b> | <b>Amino acid change</b> | <b>Detected in GenBank</b> |
|-----------|------------------------------|----------------------|--------------------------|----------------------------|
| Patient 6 | 17104C>T                     | nsp13                | H290Y                    | Yes                        |
| Patient 7 | 14407C>T                     | nsp12                | P323L                    | Yes                        |
|           | 23402G>A                     | S                    | D614G                    | Yes                        |
|           | 28881G>A                     | N                    | R203K                    | Yes                        |
|           | 28882G>A                     | N                    | R203K                    | Yes                        |
|           | 28883G>C                     | N                    | G204R                    | Yes                        |
| Patient 8 | 14407C>T                     | nsp12                | P323L                    | Yes                        |
|           | 23402G>A                     | S                    | D614G                    | Yes                        |
|           | 28881G>A                     | N                    | R203K                    | Yes                        |
|           | 28882G>A                     | N                    | R203K                    | Yes                        |
|           | 28883G>C                     | N                    | G204R                    | Yes                        |

**Note to supplementary Figure 1:** \*compared with reference strain (GenBank accession number NC\_045512.2)

Betacoronavirus Coverage - Wuhan seafood market pneumonia virus ⓘ  
MN994468.1 - Wuhan seafood market pneumonia virus isolate 201... ▾  
4 viewable accessions

[View read-level visualization >](#)

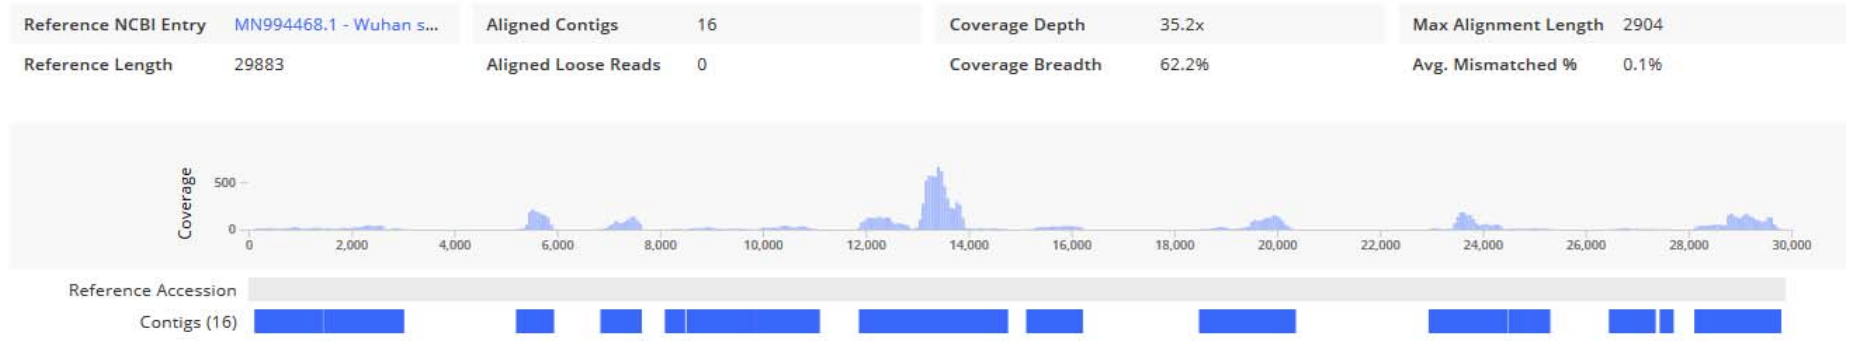

**Supplementary Figure 1:** A screen shot showing evidence of SARS-CoV-2 detection in metagenomics data using IDseq pipeline
